# Supplementary material
Source: Springer Nature journal article supplement (https://www.springermedizin.de/resource/supplementary/12990_2011_387_MOESM5_ESM.pdf/9613164)

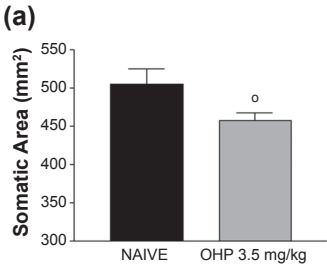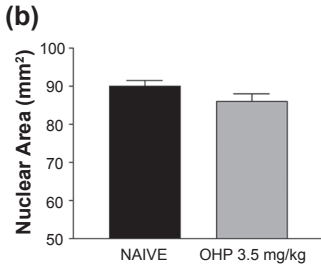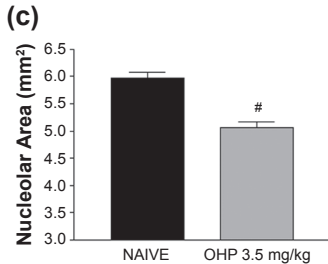

Supplement: MOESM5 [file 9613164]
